# Supplementary material for: Identification of microsatellites and their effect on economic traits of Texel × Kazakh sheep
Source: Front Vet Sci. 2025 May 29;12:1583625. doi: 10.3389/fvets.2025.1583625 (PMC12180305; doi:10.3389/fvets.2025.1583625)
Supplement: Supplementary file 9 [file Table_9.xlsx]

## Sheet: Sheet1
Table S9 Differences in the MAF214 genotypes and productive traits at the loci
Genotypes	BB	CG	AA	BI	CC	DH	AE	AJ	CJ	II
Individuals	13	10	9	9	9	8	7	6	6	6
Pre-slaughter /kg	34.95±1.15ABb	37.89±2.8AaBb	38.96±2.09AaBb	41.78±1.75Aa	36.6±2.43AaBb	39.26±3.49AaBb	39.46±2.4AaBb	41.28±2.67AaB	40.05±1.89AaBb	32.49±1.63Bb
Carcass /kg	18.13±0.72Ab	20.15±1.56Aab	20.23±1.08Aab	22.19±1.14Aa	18.52±1.67Ab	20.51±1.98Ab	20.01±1.48Aab	21.18±1.53Aab	21±1.03Aab	17.08±1.02Ab
Breast and abdomen /kg	1.33±0.11Abc	1.65±0.16Aabc	1.63±0.13Aabc	1.75±0.11Aa	1.52±0.16Aabc	1.42±0.2Aabc	1.65±0.2Aabc	1.74±0.21Aab	1.71±0.15Aabc	1.18±0.1Ac
Left anterior tendon /kg	0.33±0.02Ab	0.32±0.02Ab	0.34±0.02Aab	0.38±0.03Aa	0.31±0.02Ab	0.36±0.04Aab	0.35±0.02Aab	0.31±0.02Ab	0.33±0.02Aab	0.31±0.01Aab
Left hip leg /kg	2.41±0.09Bc	2.65±0.17ABbc	2.59±0.13ABbc	3.11±0.19Aa	2.52±0.18Bbc	2.67±0.27ABbc	2.58±0.29ABbc	2.67±0.15AaBbc	2.97±0.2AaBb	2.41±0.12ABbc
Tail fat /g	347±43.94Ab	390.05±66.71Aab	581.39±131.88Aa	489.83±70.03Aab	476.67±70.66Aab	440.19±94.28Aab	503.14±180.45Aab	317.11±97.22Aab	539.58±79.07Aab	370±86.38Aab
Mesenteric fat /g	371.08±71.43ABb	535.1±96.34AaBb	705.11±149.32Aa	554.22±70.57AaBb	407.89±126.95AaBb	351±108.23ABb	547±114.99AaBb	413.33±86.46AaBb	490.67±127.18AaBb	360.67±70.63Bb
Kidney fat /g	339.62±45.87Aab	310.66±61.48Ab	494.5±78.14Aa	351.17±68.89Ab	394.22±70.61Aab	270.75±59.44Aab	374.07±92.18Aab	307.17±87.63Aab	355.67±80.8Aab	330.92±74.84Ab
Back fat thickness /mm	4.09±0.57	3.23±0.38	4.07±0.63	4.94±0.64	3.57±0.75	3.21±0.44	4.71±0.81	4.15±1.03	3.72±0.64	4.64±0.82
GR value /mm	17.02±1.22Ab	21±2.01Aa	20.53±1.14Aab	21.11±1.22Aab	18.44±1.81Aab	17.39±1.5Aab	19.75±2.1Aab	20.41±2.48Aab	21.82±1.3Aa	16.53±2.2Ab
Longissimus dorsi /mm	339.62±20.16	351.7±31.69	349.94±23.02	395.5±18.36	369.39±23.78	379.31±39.49	370.5±23.1	393.42±34.34	407.33±18.87	345.75±24.41
Ocular muscle area /cm2	12.11±0.47	12.94±1.02	12.06±0.63	13.1±0.9	12.76±0.66	13.2±1.17	13.23±1.1	13.67±0.76	14.47±0.56	12.43±1.24
